# Supplementary material
Source: PubMed Central journal article supplement (PMC3494200)
Supplement: supp_M112.017426_mcp.M112.017426-1.pdf [file supp_M112.017426_mcp.M112.017426-1.pdf]

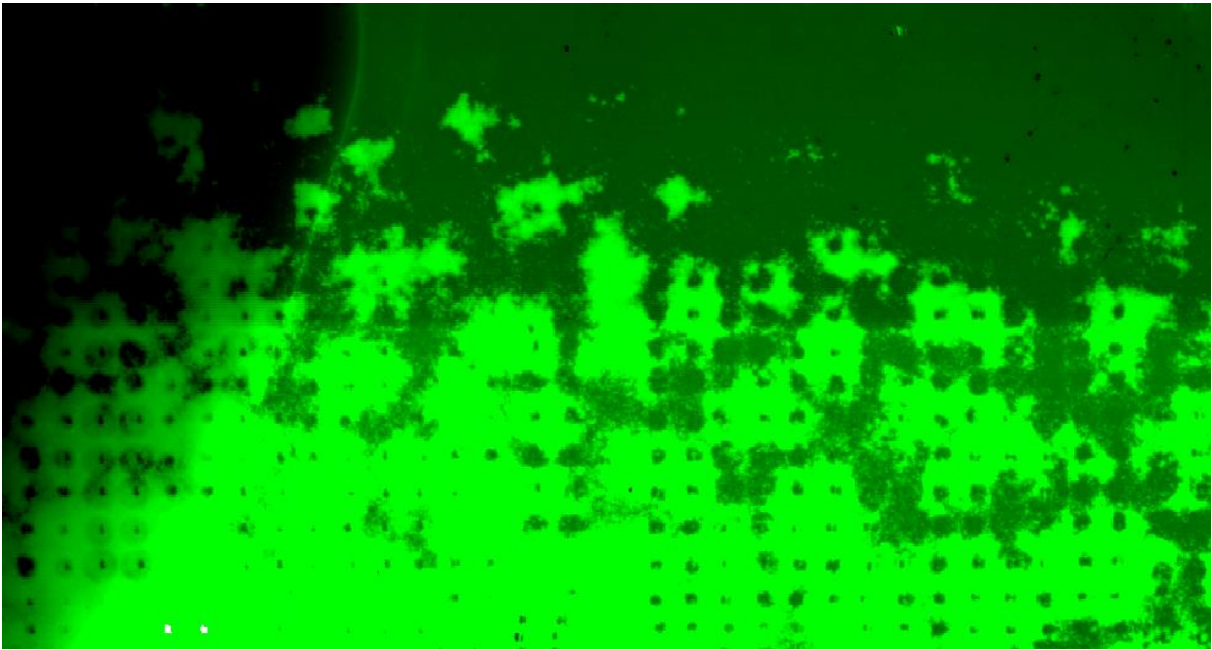

**Supplementary Information 1. The yeast proteome chip probed with conventional fluorescent liposomes containing PI(3,5)P<sub>2</sub>.** To demonstrate the limitation of conventional fluorescent liposomes on high-density chip assays, we fabricated the conventional PI(3,5)P<sub>2</sub>-containing fluorescent liposomes and probed the liposomes to the yeast proteome chips. As shown in the figure, the spot signals from the conventional liposomes would seriously overlap and blur the chip image, resulting in an unanalyzable chip data.
